# Supplementary material for: An extensive study on multiple ETL and HTL layers to design and simulation of high-performance lead-free CsSnCl3-based perovskite solar cells
Source: PubMed Central journal article supplement (PMC9925818; doi:10.1038/s41598-023-28506-2), 2023-02-13
Supplement: 41598_2023_28506_MOESM1_ESM.pdf [file 41598_2023_28506_MOESM1_ESM.pdf]

# SUPPORTING INFORMATION

## An extensive study on multiple ETL and HTL layers to design and simulation of a high-performance lead-free CsSnCl<sub>3</sub>-based perovskite solar cells

M. Khalid Hossain<sup>1,\*</sup>, G. F. Ishraque Toki<sup>2</sup>, Abdul Kuddus<sup>3</sup>, M. H. K. Rubel<sup>4,\*\*</sup>, M. M. Hossain<sup>5</sup>, H. Bencherif<sup>6</sup>, Md. Ferdous Rahman<sup>7</sup>, Md. Rasidul Islam<sup>8</sup>, Muhammad Mushtaq<sup>9</sup>

<sup>1</sup>*Institute of Electronics, Atomic Energy Research Establishment, Bangladesh Atomic Energy Commission, Dhaka 1349, Bangladesh*

<sup>2</sup>*College of Materials Science and Engineering, Donghua University, Shanghai 201620, China*

<sup>3</sup>*Graduate School of Science and Engineering, Saitama University, Saitama, 338-8570, Japan*

<sup>4</sup>*Department of Materials Science and Engineering, University of Rajshahi, Rajshahi 6205, Bangladesh*

<sup>5</sup>*Department of Physics, Chittagong University of Engineering and Technology, Chittagong 4349, Bangladesh*

<sup>6</sup>*Higher National School of Renewable Energies, Environment and Sustainable Development, Batna 05078, Algeria*

<sup>7</sup>*Department of Electrical and Electronic Engineering, Begum Rokeya University, Rangpur 5400, Bangladesh*

<sup>8</sup>*Department of Electrical and Electronic Engineering, Bangamata Sheikh Fojilatunnesa Mujib Science & Technology University, Jamalpur 2012, Bangladesh*

<sup>9</sup>*Department of Physics, University of Poonch Rawalakot, 12350, Pakistan*

\*Correspondence to: \*khalid.baec@gmail.com; khalid@kyudai.jp; \*\*mhk\_mse@ru.ac.bd

### Table of content

**Figure S1.** Effect of ETLs' thickness variation on the (a) *PCE*, (b) *FF*, (c) *J<sub>sc</sub>*, and (d) *V<sub>oc</sub>*. **S2**

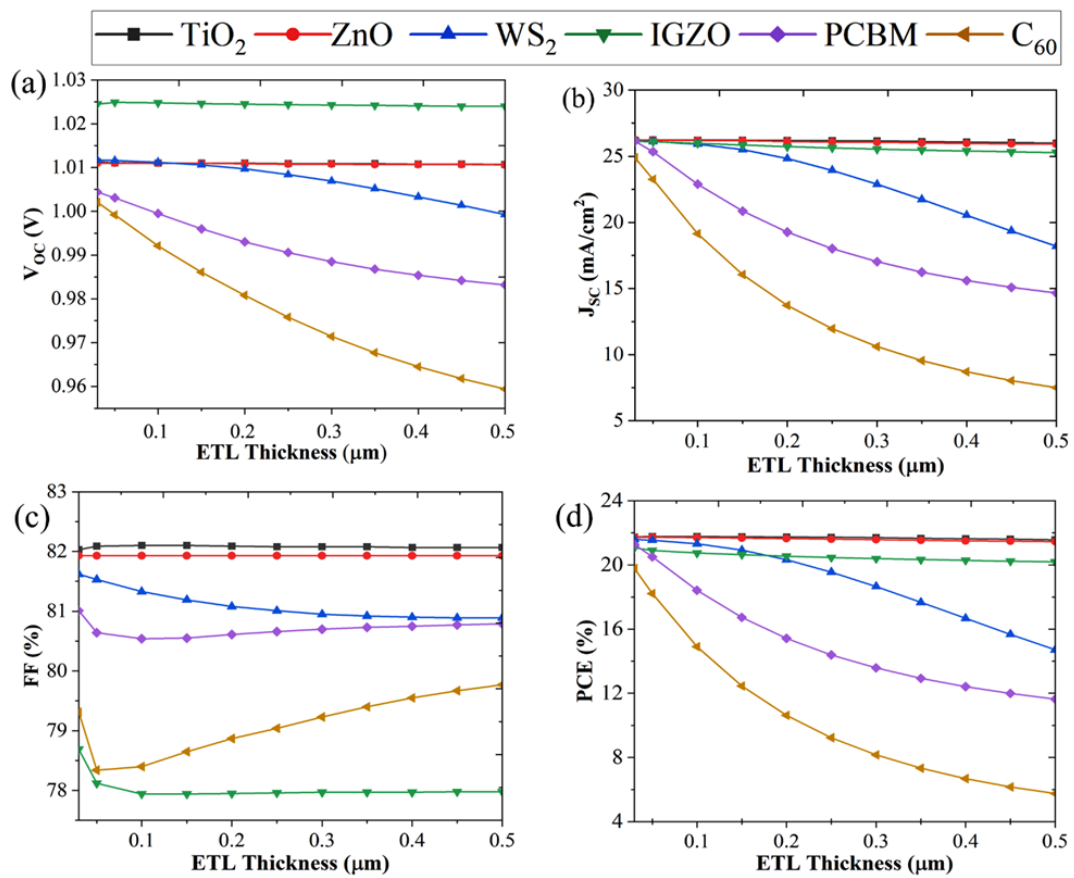

**Figure S1:** Effect of ETLs' thickness variation on the (a)  $PCE$ , (b)  $FF$ , (c)  $J_{sc}$ , and (d)  $V_{oc}$ .
